# Supplementary material for: Carbon–sulfur bond activation of thiophenes by [W(NPh){o-(Me3SiN)2C6H4}(pyridine)2]
Source: Royal Society of Chemistry journal article supplement (doi:10.1039/b101955b), 2001-01-01
Supplement: b101955b1.doc [file b101955b1.doc]

Supplementary Information for:

Carbon-sulfur bond activation of thiophenes by W(NPh)[o-(Me3SiN)2C6H4](pyridine)2

# R. C. Mills, K. A. Abboud, and J. M. Boncella*

Department of Chemistry and Center for Catalysis, University of Florida, Gainesville, FL 32611-7200

# Experimental

## General Methods. All experimental procedures were conducted under an inert atmosphere, either in a N2-filled dry box or by using standard schlenk techniques under an argon atmosphere. Anhydrous pentane and toluene were purchased from Sigma-Aldrich, passed over a column of activated alumina, stored over 4Å molecular sieves and degassed prior to use. Thiophene, 2-methylthiophene and 3-methylthiophene were purchased from Sigma-Aldrich, degassed and stored over 4Å molecular sieves prior to use. Benzothiophene was sublimed prior to use. [W(NPh)(o-(Me3SiN)2C6H4)(C5H5N)2] (1) was prepared according to previously published procedures.11

NMR spectra were obtained on Varian Gemini 300, VXR 300, or Mercury 300 instruments in C6D6 solutions, referenced to residual solvent peaks and reported relative to TMS. We have been unable to obtain satisfactory elemental analyses on these compounds. The carbon data are typically 1-1.5 % below the calculated values even for multiply recrystallized samples. To demonstrate compound purity, proton NMR spectra are included as supplementary material.

**Synthesis of [o-(Me3SiN)2C6H4](NPh)W(SC4H4)** (**2**). A Young’s ampoule was charged with W(NPh)(o-(Me3SiN)2C6H4)(C5H5N)2 (**1**) (0.30 g, 0.44 mmol) and 50 mL of toluene. Thiophene (0.07 mL, 0.88 mmol) was added and the reaction heated at 65 C for 12 hrs, during which time the solution became red in color. The reaction solvent was stripped under reduced pressure and the resulting solid extracted with several portions of cyclohexane. Subsequent drying of the red filtrate *in vacuo* yielded 0.16 g (60 %) of **2** as a dark red solid. 1H NMR (25 C, C6D6):  0.39 (s, 9H, Me3Si), 0.50 (s, 9H, Me3Si), 6.70 (dd, 1H, -CH, 3JH-H = 6.6 and 9.0 Hz), 6.71 (t, 1H, p-W≡N(C6H5), 6.94-7.02 (m, 4H, aromatic), 7.30 (m, 2H, m- pdaC6H4), 8.01 (d, 1H, -CH, 3JH-H = 9.0 Hz, 2JW-H = 8 Hz, 2JW-H = 8 Hz), 8.20 (dd, 1H, -CH, 3JH-H = 6.6 and 12.9 Hz), 9.00 (d, 1H, -CH, 3JH-H = 12.9 Hz). 13C NMR (25 C, C6D6): (Me3Si), 2.19 (Me3Si), 121.47, 122.44, 124.58, 125.67, 126.15, 126.34, 131.97, 133.11, 137.28, 139.16, 140.53, 186.38.

**Synthesis of [o-(Me3SiN)2C6H4](NPh)W(SC5H6)** (**3**). A Young’s ampoule was charged with W(NPh)(o-(Me3SiN)2C6H4)(C5H5N)2 (**1**) (0.50 g, 0.73 mmol) and 100 mL of toluene. 2-methylthiophene (0.14 mL, 1.46 mmol) was added and the reaction heated at 65 C for 9 hrs, during which time the solution became red in color. The reaction solvent was removed under reduced pressure and the resulting solid extracted with several portions of cyclohexane. Subsequent drying of the red filtrate *in vacuo* yielded 0.36 g (79 %) of **3** as a dark red solid. 1H NMR (25 C, C6D6):  0.40 (s, 9H, Me3Si), 0.51 (s, 9H, Me3Si), 2.38 (s, 3H, CH3), 6.52 (d, 1H, -CH, 3JH-H = 7 Hz), 6.72 (t, 1H, p-W≡NPh), 6.97-7.14 (m, 4H, aromatic), 7.28 (m, 2H, o-pda), 7.34 (m, 2H, m-pda), 8.21 (dd, 1H, -CH, 3JH-H = 7 and 13 Hz) 8.89 (d, 1H, -CH, 3JH-H = 13 Hz). 13C NMR (25 C, C6D6):  1.85 (Me3Si), 2.27 (Me3Si), 30.43 (CH3), 121.35, 122.46, 124.45, 125.52, 126.01, 126.21, 137.49, 140.71, 142.07, 144.98, 157.64, 184.81.

**Synthesis of [o-(Me3SiN)2C6H4](NPh)W(SC8H6)** (**4**). A Young’s ampoule was charged with W(NPh)(o-(Me3SiN)2C6H4)(C5H5N)2 (**1**) (0.30 g, 0.44 mmol) and 75 mL of toluene. Benzothiophene (0.12 g, 0.88 mmol) was added and the reaction heated at 65 C for 7 hrs, during which time the solution became red-brown in color. The reaction solvent was removed under reduced pressure. Attempts to extract the product led to decomposition. By 1H NMR, the yield of **4** was calculated to be (50 %). 1H NMR (25 C, C6D6):  0.37 (s, 9H, Me3Si), 0.48 (s, 9H, Me3Si), 6.56 (t, 1H, p-WNC6H5), 6.92-7.32 (m, 12H, aromatic), 8.52 (d, 1H, -CH, 3JH-H = 13 Hz, 2JW-H = 10 Hz), 8.67 (d, 1H, -CH, 3JH-H = 13 Hz).

**Synthesis of [o-(Me3SiN)2C6H4](NPh)W(SC5H6)** (**5a**,**b**). A Young’s ampoule was charged with W(NPh)(o-(Me3SiN)2C6H4)(C5H5N)2 (**1**) (0.50 g, 0.73 mmol) and 100 mL of toluene. 3-methylthiophene (0.14 mL, 1.46 mmol) was added and the reaction heated at 65 C for 8 hrs, during which time the solution became red-brown in color. The reaction solvent was removed under reduced pressure and the resulting solid extracted with several portions of pentane. Concentration of the red filtrate followed by cooling (-78 C) yielded 0.32 g (69 %) of **5a** and **b** as a dark red solid. 1H NMR (25 C, C6D6): **5a**,  0.43 (s, 9H, Me3Si), 0.52 (s, 9H, Me3Si), 1.98 (s, 3H, CH3), 6.57 (d, 1H, -CH, 3JH-H = 10 Hz), 8.00 (d, 1H, -CH, 3JH-H = 10 Hz), 8.75 (s, 1H, -CH), 13C NMR (25 C, C6D6): 1.83 (Me3Si), 2.23 (Me3Si), 24.48. **5b**, 0.42 (s, 9H, Me3Si), 0.51 (s, 9H, Me3Si), 2.05 (s, 3H, CH3), 7.79 (s, 1H, CH), 8.04 (d, 1H, -CH, 3JH-H = 13 Hz), 8.98 (d, 1H, -CH, 3JH-H = 13 Hz). 13C NMR (25 C, C6D6): **5a,** 1.75 (Me3Si), 1.90 (Me3Si), 24.48 (CH3),  **5b,** 1.83 (Me3Si), 2.23 (Me3Si), 30.21 (CH3). Aromatics for **5a** and **5b**: 120.98, 121.33, 121.40, 121.44, 122.33, 122.48, 124.34, 125.40, 125.48, 126.11, 126.17, 126.23, 126.26, 134.30, 135.19, 137.79, 137.87, 139.28, 141.08, 143.33, 148.08, 184.57, 186.82.
